# Supplementary material for: Melamine foam and cellulose nanofiber co-mediated assembly of graphene nanoplatelets to construct three-dimensional networks towards advanced phase change materials
Source: Royal Society of Chemistry journal article supplement (doi:10.1039/c9nr10696k), 2020-01-01
Supplement: c9nr10696k1.pdf [file c9nr10696k1.pdf]

## Supporting Information

### Melamine foam and cellulose nanofiber co-mediated assembly of graphene nanoplatelets to construct three-dimensional network towards advanced phase change material

Fei Xue, Xin-zheng Jin, Wen-yan Wang, Xiao-dong Qi, Jing-hui Yang, Yong Wang\*

School of Materials Science & Engineering, Key Laboratory of Advanced Technologies of  
Materials (Ministry of Education), Southwest Jiaotong University, Chengdu, 610031, China

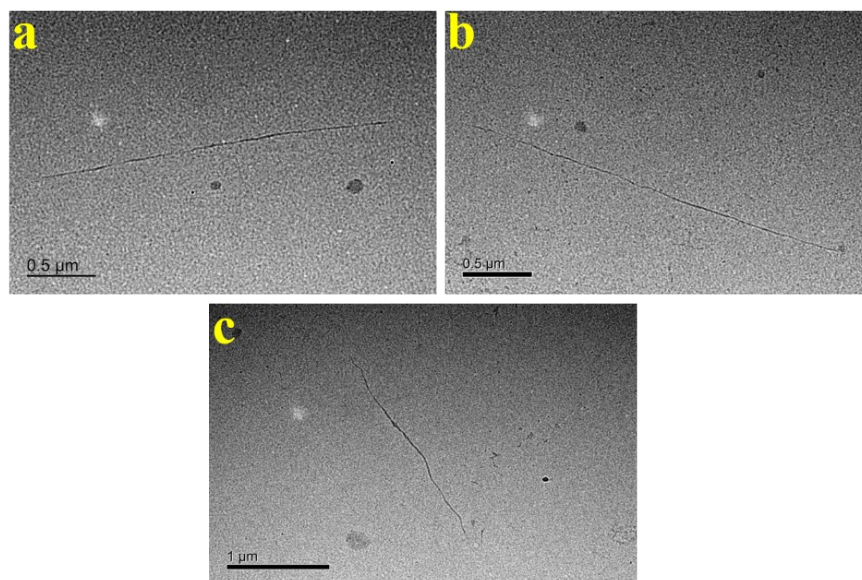

**Figure S1.** TEM images of CNF solution (the concentration of CNF solution was 0.01 wt%) (a-c).

---

\* Corresponding author: Tel: +86 28 87603042;  
E-mail: [yongwang1976@home.swjtu.edu.cn](mailto:yongwang1976@home.swjtu.edu.cn); [yongwang1976@163.com](mailto:yongwang1976@163.com)

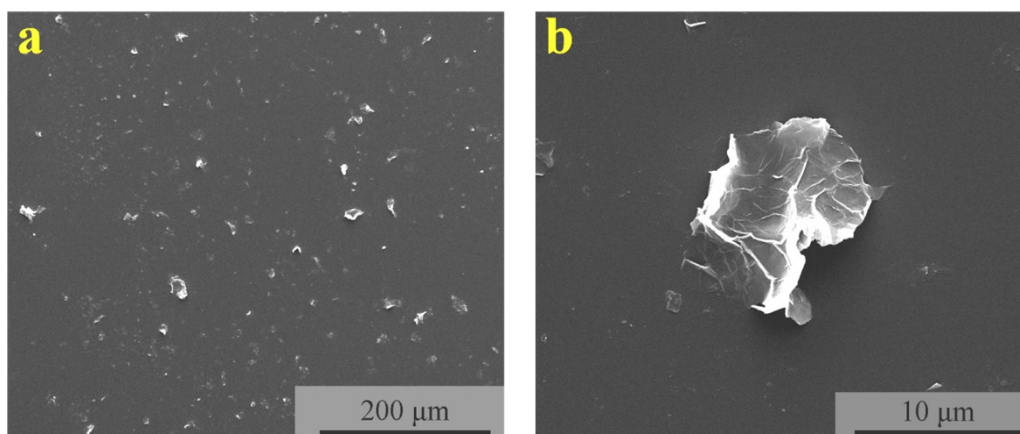

**Figure S2.** SEM images of CNF-dispersed GNPs which were obtained at (a) low and (b) high magnifications. The concentrations of CNF and GNPs solution were 0.1 and 0.3 mg/mL, respectively).

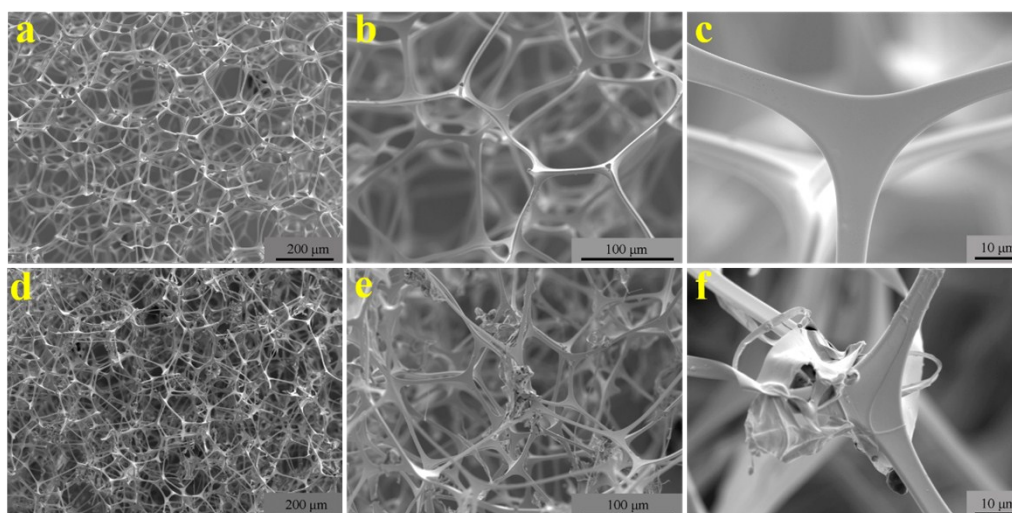

**Figure S3.** SEM images showing the morphologies of pure MF (a-c) and CNF@MF (d-f) obtained at different magnifications.

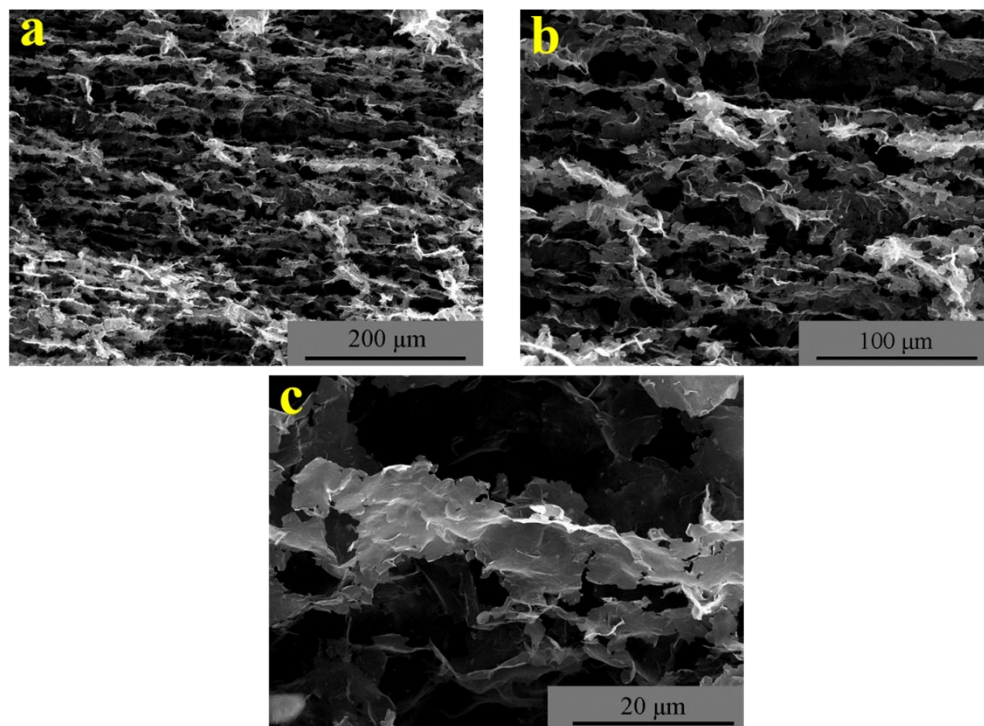

**Figure S4.** SEM images showing the morphologies of the representative CF5G16-N sample obtained at different magnifications.

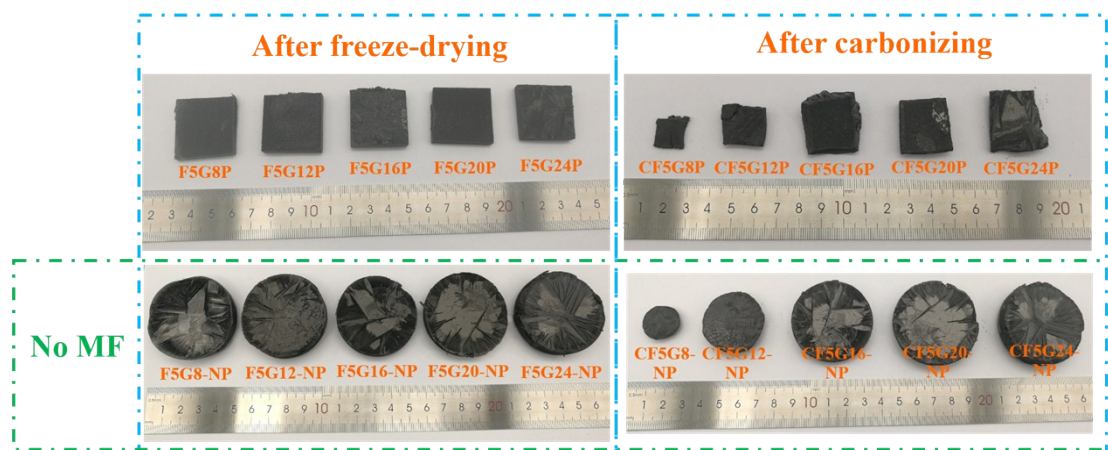

**Figure S5.** Photographs of the representative samples as indicated before carbonization (left) and after carbonization (right).

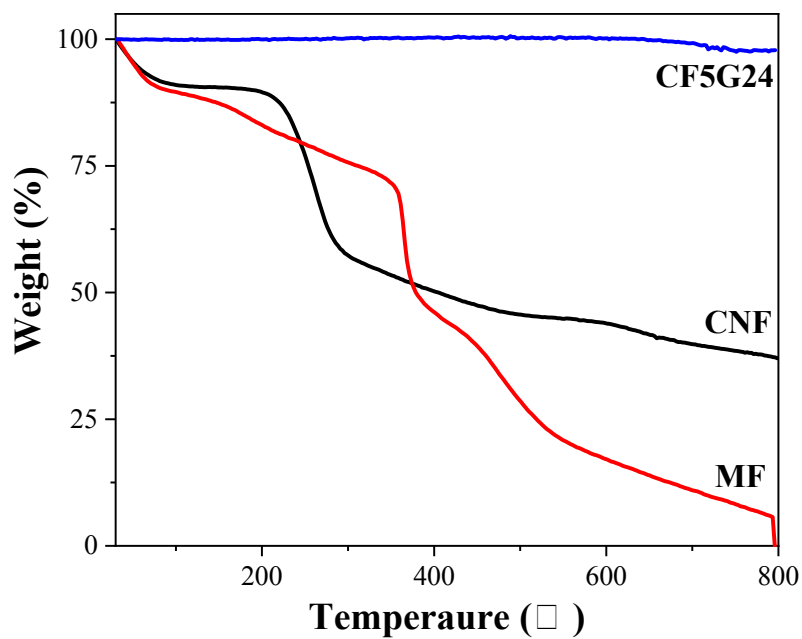

**Figure S6.** Thermogravimetric curves of the representative samples as indicated.

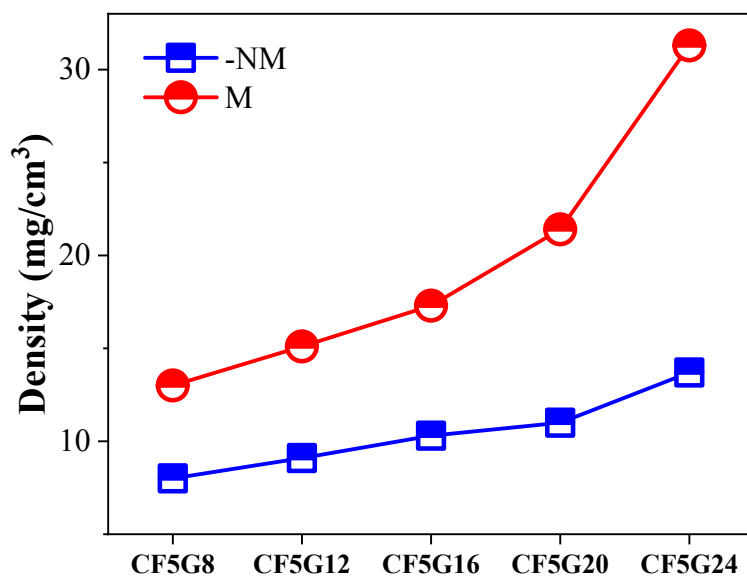

**Figure S7.** Comparison of the density between the two different series of samples. Here, ‘-NM’ represents carbonized aerogels having no MF, while ‘-M’ represents ones having MF.

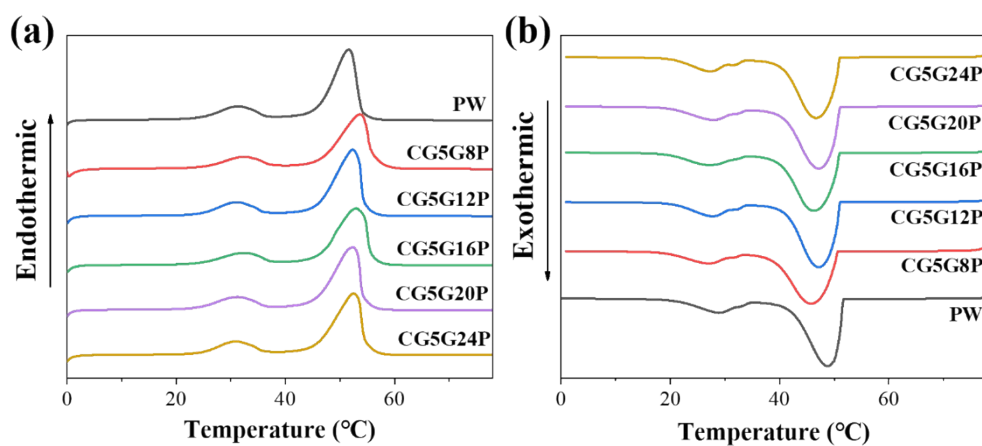

**Figure S8.** DSC curves of the representative samples as indicated in the graphs obtained during the heating (a) and cooling (b) processes.

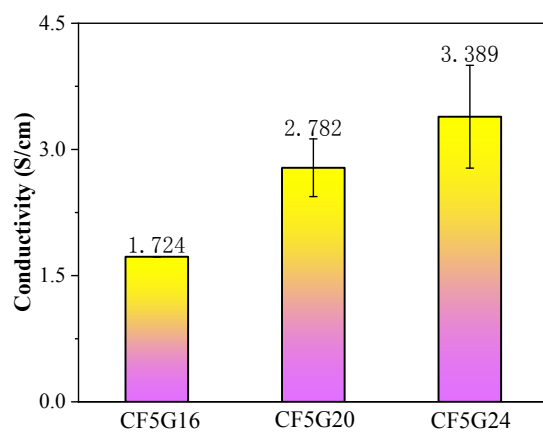

**Figure S9.** Comparison of the conductivity between the representative samples as indicated.

**Table S1. Sample notations and the corresponding compositions.**

| <b>Sample notation</b> | <b>GNP content (wt%)</b> | <b>PW content (wt%)</b> |
|------------------------|--------------------------|-------------------------|
| <b>PW</b>              | 0                        | 100                     |
| <b>CF5G8-NP</b>        | 1.30                     | 98.70                   |
| <b>CF5G8</b>           | 2.08                     | 97.92                   |
| <b>CF5G12-NP</b>       | 1.60                     | 98.40                   |
| <b>CF5G12</b>          | 2.55                     | 97.45                   |
| <b>CF5G16-NP</b>       | 2.00                     | 98.00                   |
| <b>CF5G16</b>          | 3.43                     | 96.57                   |
| <b>CF5G20-NP</b>       | 2.55                     | 97.45                   |
| <b>CF5G20</b>          | 3.62                     | 96.38                   |
| <b>CF5G24-NP</b>       | 2.93                     | 97.07                   |
| <b>CF5G24</b>          | 4.14                     | 95.86                   |
